# Supplementary material
Source: PubMed Central journal article supplement (PMC5655507)
Supplement: 10.1074_M117.806687_jbc.M117.806687-1.pdf [file 10.1074_M117.806687_jbc.M117.806687-1.pdf]

## SUPPLEMENTAL INFORMATION

Functional Defects in *Clostridium difficile* TcdB Toxin Uptake Identify CSPG4 Receptor Binding Determinants

**Pulkit Gupta<sup>1,§</sup>, Zhifen Zhang<sup>2,3,§</sup>, Seiji Sugiman-Marangos<sup>2</sup>, John Tam<sup>2</sup>, Swetha Raman<sup>2</sup>, Jean-Phillipe Julien<sup>2,3</sup>, Heather K. Kroh<sup>4</sup>, D. Borden Lacy<sup>4</sup>, Nicholas Murgolo<sup>1</sup>, Kavitha Bekkari<sup>1</sup>, Alex G. Therien<sup>1</sup>, Lorraine D. Hernandez<sup>1</sup>, Roman A. Melnyk<sup>2,3,\*</sup>**

**Supplementary figure 1.** Domain structures of TcdA and TcdB showing short repeats (green) and long repeats (yellow) in the CROP domains.

**Supplementary figure 2.** Defective TcdB mutants are folded properly. a & b, Autoprocessing activity of recombinant toxins. Recombinant TcdB variants were treated with 100  $\mu$ M InsP6 (+) or PBS (-) for 3 h and cleavage was visualized by coomassie staining. Bands were quantified by ImageJ software. Vertical lines denote splicing of the gel to exclude lanes between samples. c, GTD activity of recombinant toxins. GST-Rac1 was treated with recombinant toxins, and the level of glucosylation was determined by Western blot analysis using Mab102 that recognizes unglucosylated Rac1 (top) and an anti-Rac1 antibody to determine total Rac1 (bottom). d, pH-induced unfolding by TNS fluorescence. Defective mutants were all folded at neutral pH and began unfolding at pH<5. Both mutants (Y1824K and N1839K) show a similar unfolding profile to WT TcdB.

**Supplementary Figure 3.** Alignment of short and long repeats within the CROP domain of TcdB.

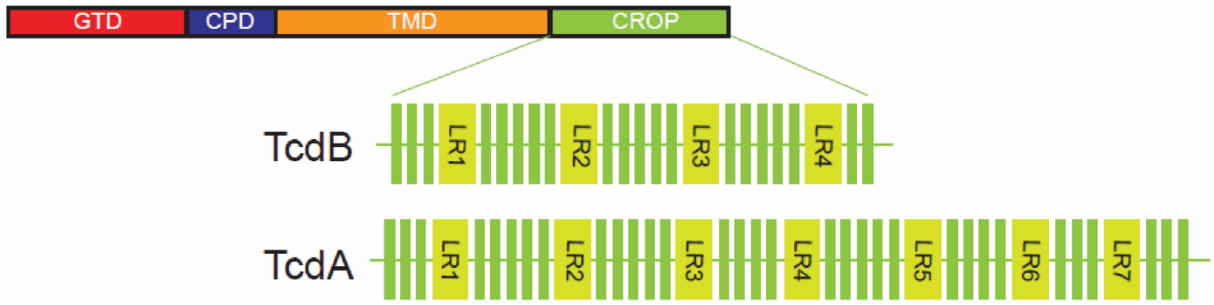

**Fig. 1**

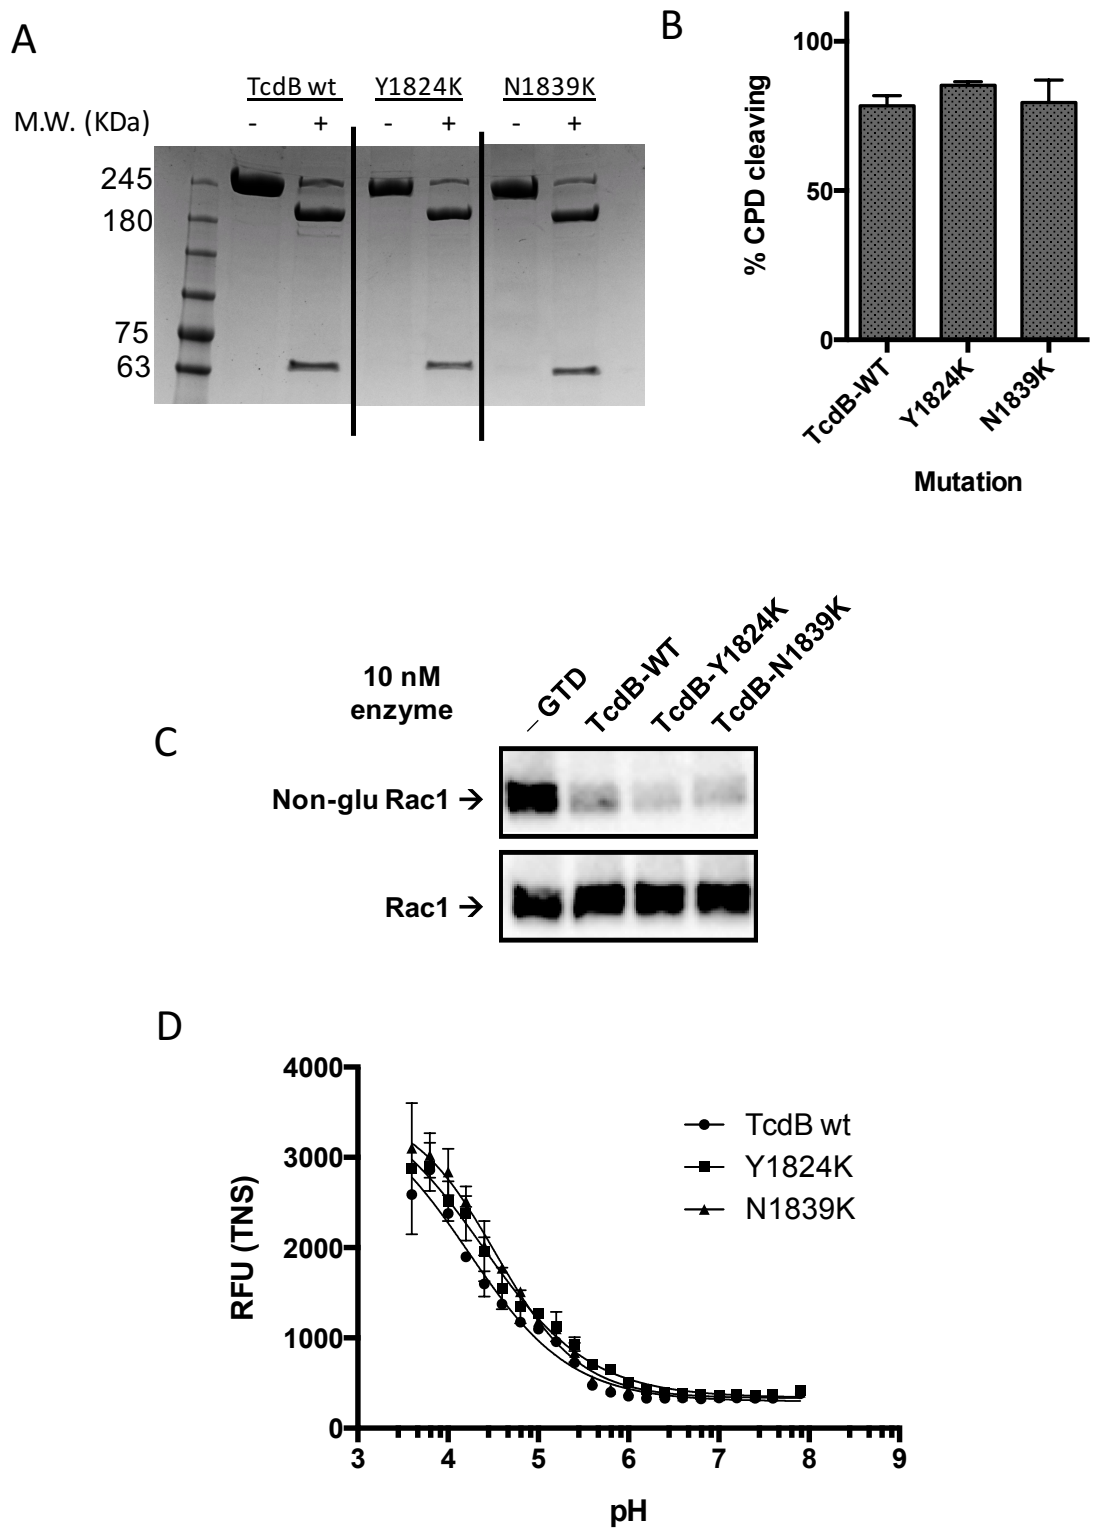

Fig. 2

|           |                                |       |
|-----------|--------------------------------|-------|
| 1791-1813 | EIILSFTPSYYEDGLIGYDL           |       |
| 1814-1833 | GLVSLYNEKFFYINNFGMMVS          | (SR?) |
| 1834-1854 | GLIYINDSLYYFKPPVNNLIT          | (SR)  |
| 1855-1876 | GFVTVGDDKYYFNPINGGAASI         | (SR)  |
| 1877-1896 | GETIIDDKNYYFNQSGVLQT           | (SR)  |
| 1897-1926 | GVFSTEDGFKYFAPANTLDENLEGEAIDFT | (LR)  |
| 1927-1947 | GKLIIDENIYYFDDNYRGAVE          | (SR)  |
| 1948-1967 | WKELDGEMHYFSPETGKAFK           | (SR)  |
| 1968-1987 | GLNQIGDYKYYFNSDGVMQK           | (SR)  |
| 1988-2007 | GFVSINDNKHYFDDSGVMKV           | (SR)  |
| 2008-2027 | GYTEIDGKHFYFAENGEMQI           | (SR)  |
| 2028-2057 | GVFNTEDGFKYFAHNEDLGNEEGEEISYS  | (LR)  |
| 2058-2078 | GILNFNNKIYYFDDSFTAVVG          | (SR)  |
| 2079-2099 | WKDLEDGSKYYFDEDTAEAYI          | (SR)  |
| 2100-2119 | GLSLINDGQYYFNDDGIMQV           | (SR)  |
| 2120-2139 | GFVTINDKVFFYFSDSGIIES          | (SR)  |
| 2140-2169 | GVQNIDDNYFYIDDNGIVQI           | (SR)  |
| 2170-2199 | GVFDTSDGYKYFAPANTVNDNIYGQAVEYS | (LR)  |
| 2200-2222 | GLVRVGEDVYYFGETYTIETGWI        | (SR)  |
| 2223-2243 | YDMENESDKYYFNPETKKACK          | (SR)  |
| 2244-2263 | GINLIDDIKYYFDEKGIMRT           | (SR)  |
| 2264-2283 | GLISFENNNYYFNENGENMQF          | (SR)  |
| 2284-2303 | GYINIEDKMFYFGEDGVMQI           | (SR)  |
| 2304-2333 | GVFNTPDGFKYFAHQNTLDENFEGESINYT | (LR)  |
| 2334-2353 | GWLDLDEKRYYYFTDEYIAAT          | (SR)  |
| 2354-2366 | GSVIIDGEEYYFDPDTAQLVISE        | (SR)  |

Fig. 3
